# Supplementary material for: Non-covalent bonds in group 1 and group 2 elements: the ‘alkalene bond’
Source: Royal Society of Chemistry journal article supplement (doi:10.1039/d2cp03904d), 2022-01-01
Supplement: d2cp03904d1.pdf [file d2cp03904d1.pdf]

## Supplementary Information

### Non-covalent Bonds in Group 1 and Group 2 Elements: The ‘Alkalene bond’

Arijit Das and E. Arunan

**Table S1.** Correlation coefficients, intercepts and slopes of the binding energy (kJ/mol) versus electron density (au) plot for various H, Li, Na, Be, Mg and Ca bonded complexes. Values in brackets denote standard deviation.

| Complexes                              | CC          | Intercept          | Slope            |
|----------------------------------------|-------------|--------------------|------------------|
| X=H                                    |             |                    |                  |
| FX⋯A                                   | 0.92        | 0.3(3.0)           | 844(85)          |
| HOX⋯A                                  | 0.94        | -1.0(1.6)          | 832(73)          |
| HSX⋯A                                  | 0.92        | -0.0(1.0)          | 648(67)          |
| Overall [by avg.]                      | 0.93        | -0.2(1.9)          | 775(75)          |
| Overall [by fit, with (0,0)]           | 0.96        | -2.2(0.9)          | 889(35)          |
| <b>Overall [by fit, without (0,0)]</b> | <b>0.95</b> | <b>-2.5(1.0)</b>   | <b>901(38)</b>   |
| X=Li                                   |             |                    |                  |
| FX⋯A                                   | 0.86        | 1.0(8.7)           | 2868(408)        |
| ClX⋯A                                  | 0.85        | 2.2(10.3)          | 2997(449)        |
| BrX⋯A                                  | 0.85        | 2.7(10.5)          | 2995(450)        |
| Overall [by avg.]                      | 0.85        | 2.0(9.8)           | 2953(436)        |
| Overall [by fit, with (0,0)]           | 0.89        | 0.7(4.4)           | 3011(199)        |
| <b>Overall [by fit, without (0,0)]</b> | <b>0.85</b> | <b>1.1(5.4)</b>    | <b>2997(239)</b> |
| X=Na                                   |             |                    |                  |
| FX⋯A                                   | 0.91        | -12.7(6.9)         | 4274(484)        |
| ClX⋯A                                  | 0.92        | -9.9(6.4)          | 4039(423)        |
| BrX⋯A                                  | 0.92        | -9.7(6.6)          | 3978(428)        |
| Overall [by avg.]                      | 0.92        | -10.8(6.6)         | 4097(445)        |
| Overall [by fit, with (0,0)]           | 0.93        | -7.0(3.0)          | 3840(202)        |
| <b>Overall [by fit, without (0,0)]</b> | <b>0.91</b> | <b>-10.5(3.6)</b>  | <b>4074(238)</b> |
| X=Be                                   |             |                    |                  |
| F <sub>2</sub> X⋯A                     | 0.96        | -58.4(6.7)         | 3030(226)        |
| Cl <sub>2</sub> X⋯A                    | 0.89        | -76.7(18.2)        | 3090(380)        |
| H <sub>2</sub> X⋯A                     | 0.92        | -78.1(14.2)        | 3261(338)        |
| Overall [by avg.]                      | <b>0.92</b> | <b>-71.1(13.0)</b> | <b>3126(315)</b> |
| Overall [by fit, with (0,0)]           | <b>0.82</b> | <b>-38.8(9.1)</b>  | <b>2408(209)</b> |

|                                        |             |                   |                  |
|----------------------------------------|-------------|-------------------|------------------|
| <b>Overall [by fit, without (0,0)]</b> | <b>0.88</b> | <b>-64.9(9.1)</b> | <b>2983(206)</b> |
| <b>X=Mg</b>                            |             |                   |                  |
| F <sub>2</sub> X···A                   | 0.95        | -20.6(7.6)        | 3596(277)        |
| Cl <sub>2</sub> X···A                  | 0.93        | -17.7(10.0)       | 3569(349)        |
| H <sub>2</sub> X···A                   | 0.97        | -15.3(4.2)        | 2960(186)        |
| Overall [by avg.]                      | <b>0.95</b> | <b>-17.9(7.3)</b> | <b>3375(271)</b> |
| Overall [by fit, with (0,0)]           | <b>0.93</b> | <b>-16.6(4.6)</b> | <b>3384(176)</b> |
| <b>Overall [by fit, without (0,0)]</b> | <b>0.93</b> | <b>-22.9(5.0)</b> | <b>3606(188)</b> |
| <b>X=Ca</b>                            |             |                   |                  |
| F <sub>2</sub> X···A                   | 0.95        | -8.9(6.7)         | 3137(260)        |
| Cl <sub>2</sub> X···A                  | 0.94        | -9.5(7.9)         | 3108(277)        |
| H <sub>2</sub> X···A                   | 0.95        | -8.0(6.0)         | 2931(245)        |
| Overall [by avg.]                      | <b>0.95</b> | <b>-8.8(6.9)</b>  | <b>3059(261)</b> |
| Overall [by fit, with (0,0)]           | <b>0.95</b> | <b>-6.6(3.2)</b>  | <b>2986(125)</b> |
| <b>Overall [by fit, without (0,0)]</b> | <b>0.94</b> | <b>-9.2(3.8)</b>  | <b>3081(143)</b> |

**Table S2.** Correlation coefficients (CC), intercepts and slopes of the binding energy (kJ/mol) versus electron density (au) plot for various non-covalent bonded complexes. ‘Overall (by avg.)’ denotes average value of correlation coefficient (CC), intercept and slope of the three sets, ‘Overall [(by fit, without (0,0))’ fits all data point without the (0,0) point]. Values in the brackets denote standard deviation. The function  $y=mx$  (without intercept) has been used to fit the data.

| Complexes                              | y=mx        |                 |
|----------------------------------------|-------------|-----------------|
|                                        | CC          | Slope           |
| <b>X=H</b>                             |             |                 |
| FX···A                                 | 0.92        | 853(28)         |
| HOX···A                                | 0.94        | 788(24)         |
| HSX···A                                | 0.92        | 649(21)         |
| Overall (by avg.)                      | 0.93        | 763(24)         |
| <b>Overall [by fit, without (0,0)]</b> | <b>0.94</b> | <b>813(19)</b>  |
| <b>X=Li</b>                            |             |                 |
| FX···A                                 | 0.86        | 2914(107)       |
| ClX···A                                | 0.85        | 3088(114)       |
| BrX···A                                | 0.85        | 3107(114)       |
| Overall (by avg.)                      | 0.85        | 3036(112)       |
| <b>Overall [by fit, without (0,0)]</b> | <b>0.85</b> | <b>3042(64)</b> |
| <b>X=Na</b>                            |             |                 |
| FX···A                                 | 0.87        | 3411(137)       |
| ClX···A                                | 0.90        | 3408(113)       |
| BrX···A                                | 0.89        | 3372(112)       |
| Overall (by avg.)                      | 0.89        | 3397(121)       |
| <b>Overall [by fit, without (0,0)]</b> | <b>0.89</b> | <b>3396(67)</b> |

| X=Be                                   |             |                 |
|----------------------------------------|-------------|-----------------|
| F <sub>2</sub> X···A                   | 0.76        | 1700(119)       |
| Cl <sub>2</sub> X···A                  | 0.65        | 1524(134)       |
| H <sub>2</sub> X···A                   | 0.62        | 1441(139)       |
| Overall (by avg.)                      | 0.68        | 1555(131)       |
| <b>Overall [by fit, without (0,0)]</b> | <b>0.67</b> | <b>1554(75)</b> |
| X=Mg                                   |             |                 |
| F <sub>2</sub> X···A                   | 0.91        | 2875(96)        |
| Cl <sub>2</sub> X···A                  | 0.90        | 2976(103)       |
| H <sub>2</sub> X···A                   | 0.94        | 2316(94)        |
| Overall (by avg.)                      | 0.92        | 2722(98)        |
| <b>Overall [by fit, without (0,0)]</b> | <b>0.88</b> | <b>2779(74)</b> |
| X=Ca                                   |             |                 |
| F <sub>2</sub> X···A                   | 0.94        | 2803(77)        |
| Cl <sub>2</sub> X···A                  | 0.93        | 2789(76)        |
| H <sub>2</sub> X···A                   | 0.94        | 2623(79)        |
| Overall (by avg.)                      | 0.94        | 2738(77)        |
| <b>Overall [by fit, without (0,0)]</b> | <b>0.93</b> | <b>2745(45)</b> |

**Table S3.** Power fit ( $y=ax^r$ ) of the binding energy (kJ/mol) versus electron density (au) data for various non-covalent bonded complexes formed by different elements. The values of the pre factor,  $a$ , and the power,  $r$ , and standard deviation from the fit, are given. Columns 1 and 2 include the correlation coefficients (CC) from the linear and power fits, which may be used to compare the fit. For Be bond, the power ( $r$ ) is close to or greater than 2.00 (in bold).

| Elements  | Linear Fit CC | Power fit CC | a                   | r                 |
|-----------|---------------|--------------|---------------------|-------------------|
| H         | 0.95          | 0.95         | 1248(220)           | 1.12(0.05)        |
| Li        | 0.85          | 0.85         | 2585(894)           | 0.96(0.09)        |
| Na        | 0.91          | 0.91         | 8854(3429)          | 1.23(0.09)        |
| <b>Be</b> | <b>0.88</b>   | <b>0.92</b>  | <b>61627(30220)</b> | <b>2.21(0.16)</b> |
| Mg        | 0.93          | 0.93         | 11780(3628)         | 1.41(0.09)        |
| Ca        | 0.94          | 0.94         | 4428(982)           | 1.13(0.06)        |

**Table S4:** Correlation coefficients (CC), intercept, and slope for group 1 and group 2 elements with and without correcting the Basis Set Superposition Error (BSSE) in energy.

| Elements  | With BSSE Corrected Energy |            |           | Without BSSE Corrected Energy |             |           |
|-----------|----------------------------|------------|-----------|-------------------------------|-------------|-----------|
|           | CC                         | Intercept  | Slope     | CC                            | Intercept   | Slope     |
| <b>H</b>  | 0.95                       | -2.5(1.0)  | 901(38)   | 0.97                          | -0.12(0.89) | 986(35)   |
| <b>Li</b> | 0.85                       | 1.1(5.4)   | 2997(239) | 0.86                          | 4.9(5.4)    | 3176(238) |
| <b>Na</b> | 0.91                       | -10.5(3.6) | 4074(238) | 0.94                          | -9.1(3.2)   | 4256(210) |
| <b>Be</b> | 0.88                       | -64.9(9.1) | 2983(206) | 0.88                          | -62.7(9.6)  | 3164(217) |
| <b>Mg</b> | 0.93                       | -22.9(5.0) | 3606(188) | 0.92                          | -20.2(5.3)  | 3713(201) |
| <b>Ca</b> | 0.94                       | -9.2(3.8)  | 3081(143) | 0.94                          | -7.4(4.2)   | 3260(160) |

**Table S5:** Comparison of slope from other studies and present work. References are from main text.

| Method                  | CC          | Intercept         | Slope            | Reference |
|-------------------------|-------------|-------------------|------------------|-----------|
| H                       |             |                   |                  |           |
| MP2(full)/aug-cc-pVTZ   | 0.88        | -0.4              | 777              | [37]      |
| MP2(full)/aug-cc-pVTZ   | 0.98        | -5.1              | 1101             | [83]      |
| B3LYP/6-311++G(d,p)     | 0.86        | -2.9(5.6)         | 911(141)         | [97]      |
| MP2/aug-cc-pVDZ         | <b>0.95</b> | <b>-2.5(1.0)</b>  | <b>901(38)</b>   | This work |
| Li                      |             |                   |                  |           |
| MP2(full)/aug-cc-pVTZ   | 0.97        | -17.6             | 3271             | [37]      |
| MP2(full)/aug-cc-pVTZ   | 0.96        | -13.1             | 3218             | [83]      |
| MP2/aug-cc-pVDZ         | <b>0.85</b> | <b>1.1(5.4)</b>   | <b>2997(239)</b> | This work |
| Na                      |             |                   |                  |           |
| MP2(full)/6-311++G(d,p) | 0.90        | 18.0(9.6)         | 4699(536)        | [34]      |
| MP2/aug-cc-pVDZ         | <b>0.91</b> | <b>-10.5(3.6)</b> | <b>4074(238)</b> | This work |
| Be                      |             |                   |                  |           |
| CCSD(T)/aug-cc-pVTZ     | 0.87        | -64.1(16.6)       | 2600(308)        | [40]      |
| G4                      | 0.77        | -68.0(46.3)       | 2813(694)        | [44]      |
| MP2/aug-cc-pVDZ         | <b>0.88</b> | <b>-64.9(9.1)</b> | <b>2983(206)</b> | This work |
| Mg                      |             |                   |                  |           |
| B3LYP/6-311+G(3df,2p)   | 0.93        | -29.2(13.7)       | 3599(466)        | [46]      |
| MP2/aug-cc-pVDZ         | <b>0.93</b> | <b>-22.9(5.0)</b> | <b>3606(188)</b> | This work |
| Ca                      |             |                   |                  |           |
| G4                      | 0.97        | -3.0(18.6)        | 3082(566)        | [49]      |
| MP2/aug-cc-pVDZ         | <b>0.94</b> | <b>-9.2(3.8)</b>  | <b>3081(143)</b> | This work |

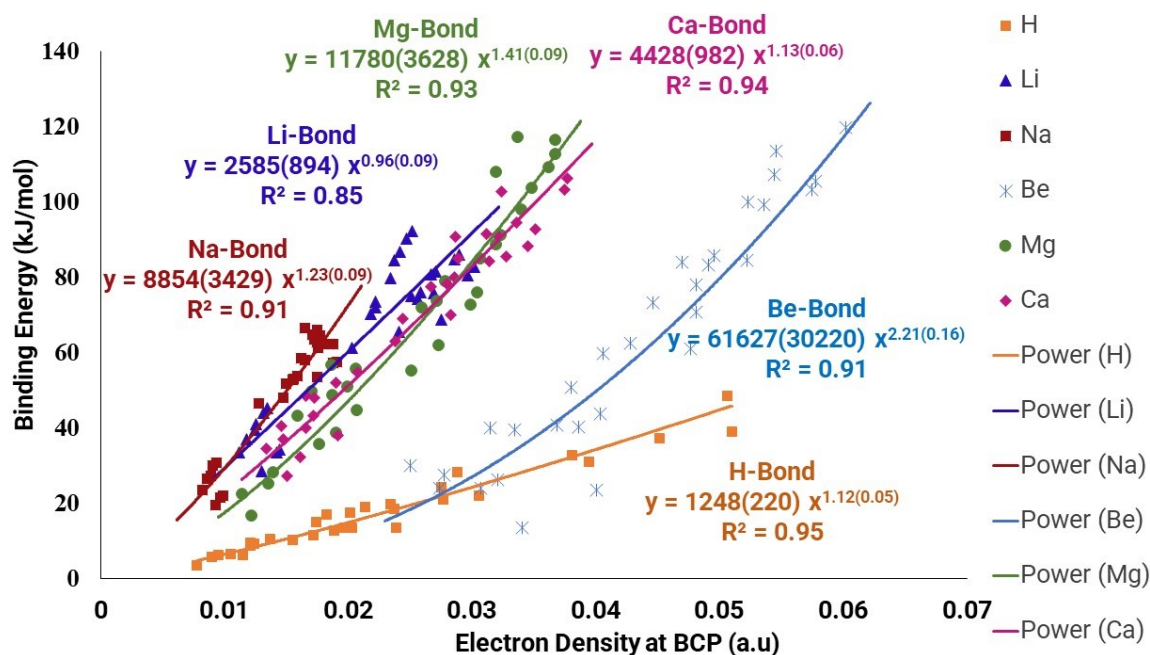

**Figure S1.** Power fit ( $ax^r$ ) of the binding energy (kJ/mol) versus electron density (a.u.) for alkene (Li, Na, Be, Mg, Ca) and hydrogen (H) bonded complexes. Values of the prefactor ( $a$ ) and power ( $r$ ) of the best fit lines are shown along with their respective standard deviation. The  $R^2$  value denotes the quality of the fit.

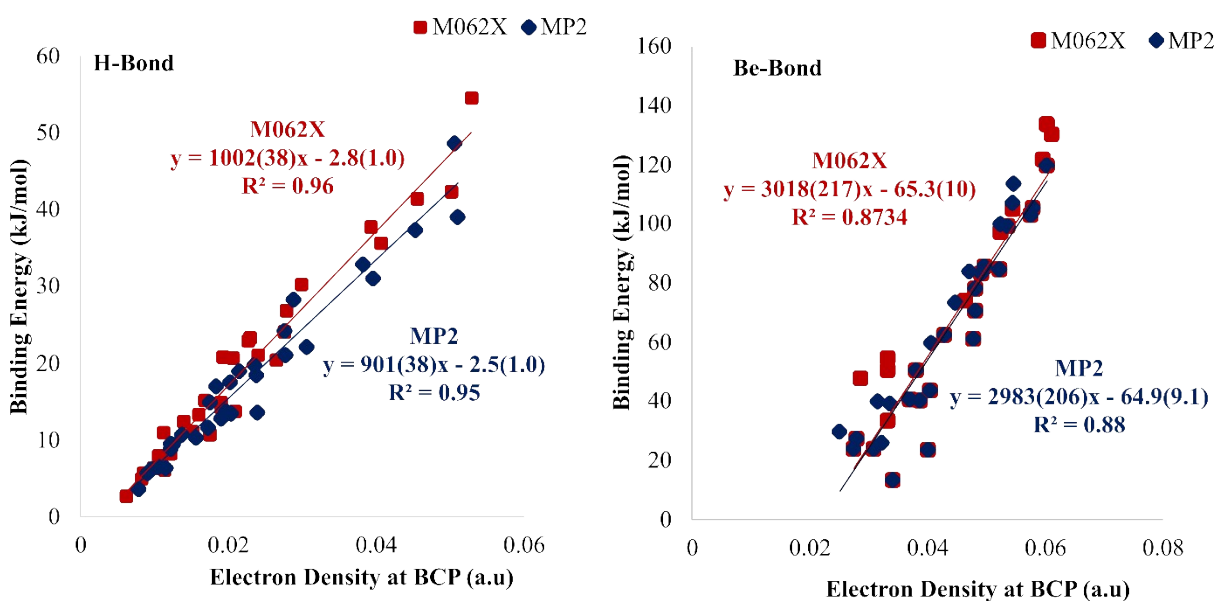

**Figure S2.** Comparison of slopes and intercepts from binding energy and electron density plots obtained from M062X and MP2 methods for H and Be-bonds.

The following section contains all data sets. (Tables D1 to D6 and Figures D1 to D6).

## All Data Sets

**Table D1.** Electron density at BCP (au) and binding energy (kJ/mol) data for H-bonded complexes.

| Complexes                              | Electron Density (au) | Binding Energy (kJ/mol) |
|----------------------------------------|-----------------------|-------------------------|
| FH•••OH <sub>2</sub>                   | 0.0381                | 32.9                    |
| FH•••SH <sub>2</sub>                   | 0.0214                | 19.0                    |
| FH•••NH <sub>3</sub>                   | 0.0506                | 48.7                    |
| FH•••NCH                               | 0.0288                | 28.3                    |
| FH•••CO                                | 0.0203                | 13.5                    |
| FH•••HCHO                              | 0.0395                | 31.1                    |
| FH•••C <sub>2</sub> H <sub>4</sub>     | 0.0183                | 17.1                    |
| FH•••CH <sub>3</sub> OH                | 0.0452                | 37.4                    |
| FH•••PH <sub>3</sub>                   | 0.0202                | 17.6                    |
| FH•••O(CH <sub>3</sub> ) <sub>2</sub>  | 0.051                 | 39.1                    |
| HOH•••OH <sub>2</sub>                  | 0.0237                | 18.5                    |
| HOH•••SH <sub>2</sub>                  | 0.0137                | 10.7                    |
| HOH•••NH <sub>3</sub>                  | 0.0275                | 24.3                    |
| HOH•••NCH                              | 0.0174                | 15.0                    |
| HOH•••CO                               | 0.0115                | 6.4                     |
| HOH•••OCH <sub>2</sub>                 | 0.0234                | 19.8                    |
| HOH•••C <sub>2</sub> H <sub>4</sub>    | 0.0121                | 9.5                     |
| HOH•••OHCH <sub>3</sub>                | 0.0277                | 21.1                    |
| HOH•••PH <sub>3</sub>                  | 0.0121                | 8.9                     |
| HOH•••O(CH <sub>3</sub> ) <sub>2</sub> | 0.0306                | 22.1                    |
| HSH•••OH <sub>2</sub>                  | 0.0155                | 10.4                    |
| HSH•••SH <sub>2</sub>                  | 0.0105                | 6.5                     |
| HSH•••NH <sub>3</sub>                  | 0.0197                | 13.7                    |
| HSH•••NCH                              | 0.0124                | 9.4                     |
| HSH•••CO                               | 0.0078                | 3.6                     |
| HSH•••OCH <sub>2</sub>                 | 0.0172                | 11.7                    |
| HSH•••C <sub>2</sub> H <sub>4</sub>    | 0.0095                | 6.3                     |
| HSH•••OHCH <sub>3</sub>                | 0.0189                | 12.9                    |
| HSH•••PH <sub>3</sub>                  | 0.009                 | 5.7                     |
| HSH•••O(CH <sub>3</sub> ) <sub>2</sub> | 0.0239                | 13.6                    |

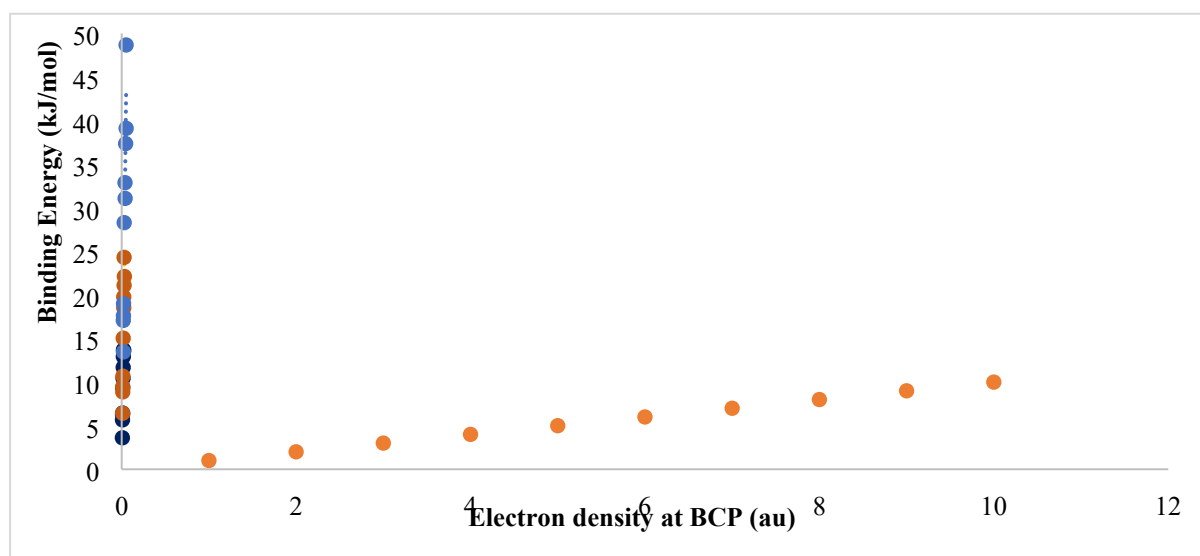

**Figure D1.** Binding energy (kJ/mol) versus electron density at BCP (au) plot for H-bonded complexes

**Table D2.** Electron density at BCP (au) and binding energy (kJ/mol) data for Li-bonded complexes.

| Complexes                               | Electron Density (au) | Binding Energy (kJ/mol) |
|-----------------------------------------|-----------------------|-------------------------|
| FLi•••OH <sub>2</sub>                   | 0.0241                | 65.7                    |
| FLi•••NCCH <sub>3</sub>                 | 0.0222                | 73.7                    |
| FLi•••NH <sub>3</sub>                   | 0.0234                | 79.9                    |
| FLi•••NCH                               | 0.0203                | 61.3                    |
| FLi•••OCH <sub>2</sub>                  | 0.0251                | 75.0                    |
| FLi •••C <sub>2</sub> H <sub>4</sub>    | 0.0112                | 33.5                    |
| FLi•••OHCH <sub>3</sub>                 | 0.0269                | 75.9                    |
| FLi•••PH <sub>3</sub>                   | 0.0118                | 37.0                    |
| FLi•••CO                                | 0.013                 | 28.7                    |
| FLi•••O(CH <sub>3</sub> ) <sub>2</sub>  | 0.0275                | 68.8                    |
| CLi•••OH <sub>2</sub>                   | 0.0256                | 74.3                    |
| CLi •••NCCH <sub>3</sub>                | 0.0237                | 84.5                    |
| CLi•••NH <sub>3</sub>                   | 0.0247                | 90.3                    |
| CLi•••NCH                               | 0.0218                | 70.3                    |
| CLi•••OCH <sub>2</sub>                  | 0.0267                | 80.9                    |
| CLi•••C <sub>2</sub> H <sub>4</sub>     | 0.0125                | 39.7                    |
| CLi•••OHCH <sub>3</sub>                 | 0.0286                | 84.8                    |
| CLi•••PH <sub>3</sub>                   | 0.0132                | 44.0                    |
| CLi•••CO                                | 0.0142                | 33.5                    |
| CLi•••O(CH <sub>3</sub> ) <sub>2</sub>  | 0.0297                | 80.7                    |
| BrLi•••OH <sub>2</sub>                  | 0.0259                | 76.2                    |
| BrLi•••NCCH <sub>3</sub>                | 0.0242                | 86.8                    |
| BrLi•••NH <sub>3</sub>                  | 0.0252                | 92.4                    |
| BrL•••NCH                               | 0.0222                | 72.2                    |
| BrLi•••OCH <sub>2</sub>                 | 0.0271                | 81.7                    |
| BrLi •••C <sub>2</sub> H <sub>4</sub>   | 0.0126                | 41.0                    |
| BrLi•••OHCH <sub>3</sub>                | 0.029                 | 86.3                    |
| BrLi•••PH <sub>3</sub>                  | 0.0135                | 45.4                    |
| BrLj•••CO                               | 0.0145                | 34.4                    |
| BrLi•••O(CH <sub>3</sub> ) <sub>2</sub> | 0.0302                | 82.7                    |

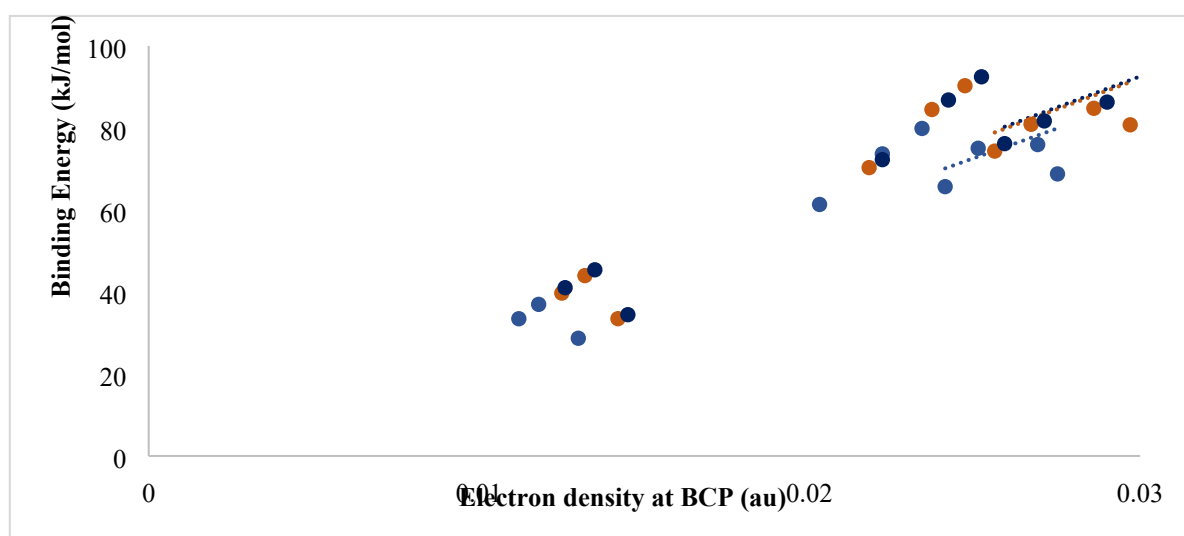

**Figure D2.** Binding energy (kJ/mol) versus electron density at BCP (au) plot for Li-bonded complexes.

**Table D3.** Electron density at BCP (au) and binding energy (kJ/mol) data for Na-bonded complexes.

| Complexes                               | Electron Density (au) | Binding Energy (kJ/mol) |
|-----------------------------------------|-----------------------|-------------------------|
| FNa•••OH <sub>2</sub>                   | 0.0128                | 46.5                    |
| FNa•••NCCH <sub>3</sub>                 | 0.0162                | 58.7                    |
| FNa•••NH <sub>3</sub>                   | 0.0165                | 58.0                    |
| FNa•••NCH                               | 0.0148                | 48.0                    |
| FNa•••OCH <sub>2</sub>                  | 0.0165                | 66.5                    |
| FNa•••C <sub>2</sub> H <sub>4</sub>     | 0.0082                | 23.5                    |
| FNa•••OHCH <sub>3</sub>                 | 0.0176                | 61.4                    |
| FNa•••PH <sub>3</sub>                   | 0.0086                | 26.7                    |
| FNa•••CO                                | 0.0093                | 19.6                    |
| FNa•••O(CH <sub>3</sub> ) <sub>2</sub>  | 0.0175                | 53.7                    |
| ClNa•••OH <sub>2</sub>                  | 0.015                 | 51.9                    |
| ClNa•••NCCH <sub>3</sub>                | 0.0171                | 64.8                    |
| ClNa•••NH <sub>3</sub>                  | 0.0174                | 63.6                    |
| ClNa•••NCH                              | 0.0156                | 53.0                    |
| ClNa•••OCH <sub>2</sub>                 | 0.0173                | 63.6                    |
| ClNa•••C <sub>2</sub> H <sub>4</sub>    | 0.0087                | 26.7                    |
| ClNa•••OHCH <sub>3</sub>                | 0.0184                | 62.4                    |
| ClNa•••PH <sub>3</sub>                  | 0.0091                | 30.1                    |
| ClNa•••CO                               | 0.0097                | 21.7                    |
| ClNa•••O(CH <sub>3</sub> ) <sub>2</sub> | 0.0188                | 57.4                    |
| BrNa•••OH <sub>2</sub>                  | 0.0155                | 52.9                    |
| BrNa•••NCCH <sub>3</sub>                | 0.0175                | 66.1                    |
| BrNa•••NH <sub>3</sub>                  | 0.0177                | 64.7                    |
| BrNa•••NCH                              | 0.0159                | 53.9                    |
| BrNa•••OCH <sub>2</sub>                 | 0.0175                | 62.8                    |
| BrNa•••C <sub>2</sub> H <sub>4</sub>    | 0.0089                | 27.3                    |
| BrNa•••OHCH <sub>3</sub>                | 0.0188                | 62.3                    |
| BrNa•••PH <sub>3</sub>                  | 0.0094                | 30.8                    |
| BrNa•••CO                               | 0.0099                | 22.1                    |
| BrNa•••O(CH <sub>3</sub> ) <sub>2</sub> | 0.0191                | 57.7                    |

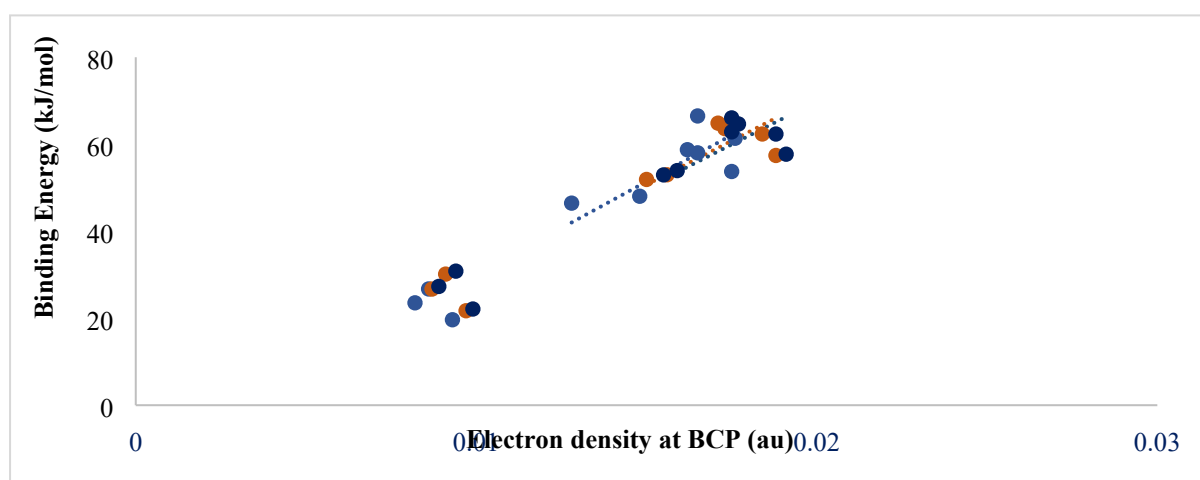

**Figure D3.** Binding energy (kJ/mol) versus electron density at BCP (au) plot for Na-bonded complexes.



**Table D4.** Electron density at BCP (au) and binding energy (kJ/mol) data for Be-bonded complexes.

| Complexes                                             | Electron Density (au) | Binding Energy (kJ/mol) |
|-------------------------------------------------------|-----------------------|-------------------------|
| F <sub>2</sub> Be•••OH <sub>2</sub>                   | 0.047                 | 84.0                    |
| F <sub>2</sub> Be•••SH <sub>2</sub>                   | 0.0315                | 40.0                    |
| F <sub>2</sub> Be•••NH <sub>3</sub>                   | 0.0546                | 113.7                   |
| F <sub>2</sub> Be•••NCH                               | 0.0406                | 59.8                    |
| F <sub>2</sub> Be•••OCH <sub>2</sub>                  | 0.0446                | 73.4                    |
| F <sub>2</sub> Be•••C <sub>2</sub> H <sub>4</sub>     | 0.025                 | 30.0                    |
| F <sub>2</sub> Be•••OHCH <sub>3</sub>                 | 0.0523                | 100.0                   |
| F <sub>2</sub> Be•••PH <sub>3</sub>                   | 0.0335                | 39.6                    |
| F <sub>2</sub> Be•••CO                                | 0.0321                | 26.3                    |
| F <sub>2</sub> Be•••O(CH <sub>3</sub> ) <sub>2</sub>  | 0.0544                | 107.3                   |
| Cl <sub>2</sub> Be•••OH <sub>2</sub>                  | 0.0522                | 84.7                    |
| Cl <sub>2</sub> Be•••SH <sub>2</sub>                  | 0.0369                | 40.8                    |
| Cl <sub>2</sub> Be•••NH <sub>3</sub>                  | 0.0602                | 119.8                   |
| Cl <sub>2</sub> Be•••NCH                              | 0.0477                | 61.2                    |
| Cl <sub>2</sub> Be•••OCH <sub>2</sub>                 | 0.0481                | 70.8                    |
| Cl <sub>2</sub> Be•••C <sub>2</sub> H <sub>4</sub>    | 0.0278                | 27.6                    |
| Cl <sub>2</sub> Be•••OHCH <sub>3</sub>                | 0.0575                | 103.3                   |
| Cl <sub>2</sub> Be•••PH <sub>3</sub>                  | 0.0404                | 43.8                    |
| Cl <sub>2</sub> Be•••CO                               | 0.0401                | 23.6                    |
| Cl <sub>2</sub> Be•••O(CH <sub>3</sub> ) <sub>2</sub> | 0.0578                | 105.7                   |
| H <sub>2</sub> Be•••OH <sub>2</sub>                   | 0.0428                | 62.7                    |
| H <sub>2</sub> Be•••SH <sub>2</sub>                   | 0.0274                | 24.2                    |
| H <sub>2</sub> Be•••NH <sub>3</sub>                   | 0.0496                | 85.9                    |
| H <sub>2</sub> Be•••NCH                               | 0.0386                | 40.3                    |
| H <sub>2</sub> Be•••OCH <sub>2</sub>                  | 0.038                 | 50.8                    |
| H <sub>2</sub> Be•••NH <sub>2</sub> CH <sub>3</sub>   | 0.0536                | 99.3                    |
| H <sub>2</sub> Be•••OHCH <sub>3</sub>                 | 0.0481                | 78.2                    |
| H <sub>2</sub> Be•••PH <sub>3</sub>                   | 0.0307                | 24.1                    |
| H <sub>2</sub> Be•••CO                                | 0.0341                | 13.7                    |
| H <sub>2</sub> Be•••O(CH <sub>3</sub> ) <sub>2</sub>  | 0.0491                | 83.3                    |

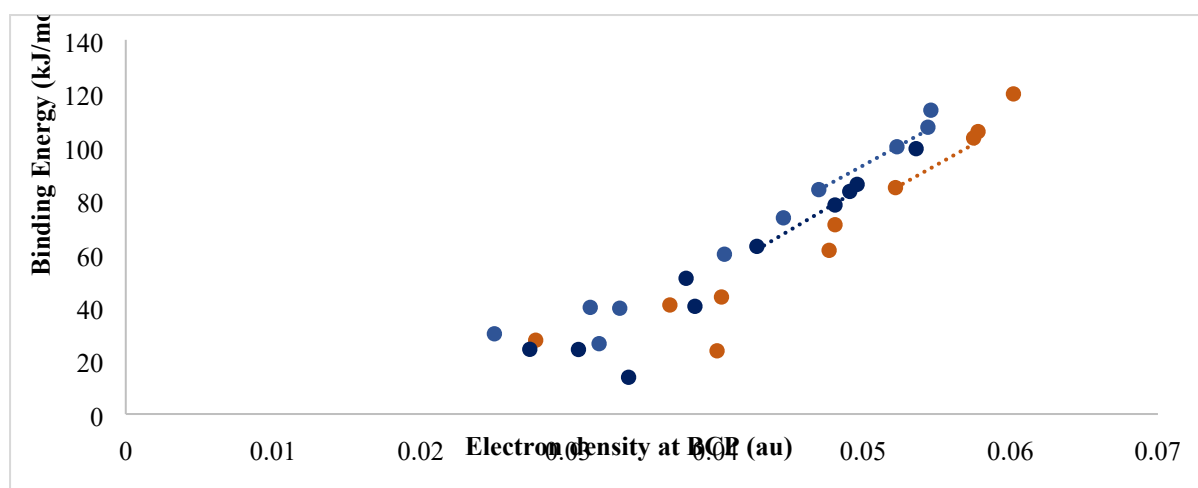

**Figure D4.** Binding energy (kJ/mol) versus electron density at BCP (au) plot for Be-bonded complexes.

**Table D5.** Electron density at BCP (au) and binding energy (kJ/mol) data for Mg-bonded complexes.

| Complexes                                             | Electron Density (au) | Binding Energy (kJ/mol) |
|-------------------------------------------------------|-----------------------|-------------------------|
| F <sub>2</sub> Mg•••OH <sub>2</sub>                   | 0.0324                | 91.0                    |
| F <sub>2</sub> Mg•••SH <sub>2</sub>                   | 0.02                  | 50.9                    |
| F <sub>2</sub> Mg•••NH <sub>3</sub>                   | 0.032                 | 107.9                   |
| F <sub>2</sub> Mg•••NCH                               | 0.026                 | 71.9                    |
| F <sub>2</sub> Mg•••OCH <sub>2</sub>                  | 0.0307                | 84.8                    |
| F <sub>2</sub> Mg•••C <sub>2</sub> H <sub>4</sub>     | 0.016                 | 43.1                    |
| F <sub>2</sub> Mg•••OHCH <sub>3</sub>                 | 0.0349                | 103.7                   |
| F <sub>2</sub> Mg•••PH <sub>3</sub>                   | 0.0188                | 48.5                    |
| F <sub>2</sub> Mg•••CO                                | 0.0177                | 35.5                    |
| F <sub>2</sub> Mg•••O(CH <sub>3</sub> ) <sub>2</sub>  | 0.0363                | 109.2                   |
| Cl <sub>2</sub> Mg•••OH <sub>2</sub>                  | 0.0341                | 97.8                    |
| Cl <sub>2</sub> Mg•••SH <sub>2</sub>                  | 0.0187                | 56.7                    |
| Cl <sub>2</sub> Mg•••NH <sub>3</sub>                  | 0.0338                | 117.2                   |
| Cl <sub>2</sub> Mg•••NCH                              | 0.0279                | 78.9                    |
| Cl <sub>2</sub> Mg•••HCHO                             | 0.032                 | 88.5                    |
| Cl <sub>2</sub> Mg•••C <sub>2</sub> H <sub>4</sub>    | 0.0171                | 49.6                    |
| Cl <sub>2</sub> Mg•••OHCH <sub>3</sub>                | 0.0368                | 112.7                   |
| Cl <sub>2</sub> Mg•••PH <sub>3</sub>                  | 0.0207                | 55.7                    |
| Cl <sub>2</sub> Mg•••CO                               | 0.0191                | 38.5                    |
| Cl <sub>2</sub> Mg•••O(CH <sub>3</sub> ) <sub>2</sub> | 0.0368                | 116.4                   |
| H <sub>2</sub> Mg•••OH <sub>2</sub>                   | 0.0274                | 61.9                    |
| H <sub>2</sub> Mg•••SH <sub>2</sub>                   | 0.014                 | 28.2                    |
| H <sub>2</sub> Mg•••NH <sub>3</sub>                   | 0.0272                | 73.7                    |
| H <sub>2</sub> Mg•••NCH                               | 0.0208                | 44.5                    |
| H <sub>2</sub> Mg•••OCH <sub>2</sub>                  | 0.0252                | 55.0                    |
| H <sub>2</sub> Mg•••C <sub>2</sub> H <sub>4</sub>     | 0.0115                | 22.4                    |
| H <sub>2</sub> Mg•••OHCH <sub>3</sub>                 | 0.03                  | 72.6                    |
| H <sub>2</sub> Mg•••PH <sub>3</sub>                   | 0.0136                | 25.2                    |
| H <sub>2</sub> Mg•••CO                                | 0.0123                | 16.5                    |
| H <sub>2</sub> Mg•••O(CH <sub>3</sub> ) <sub>2</sub>  | 0.0305                | 75.9                    |

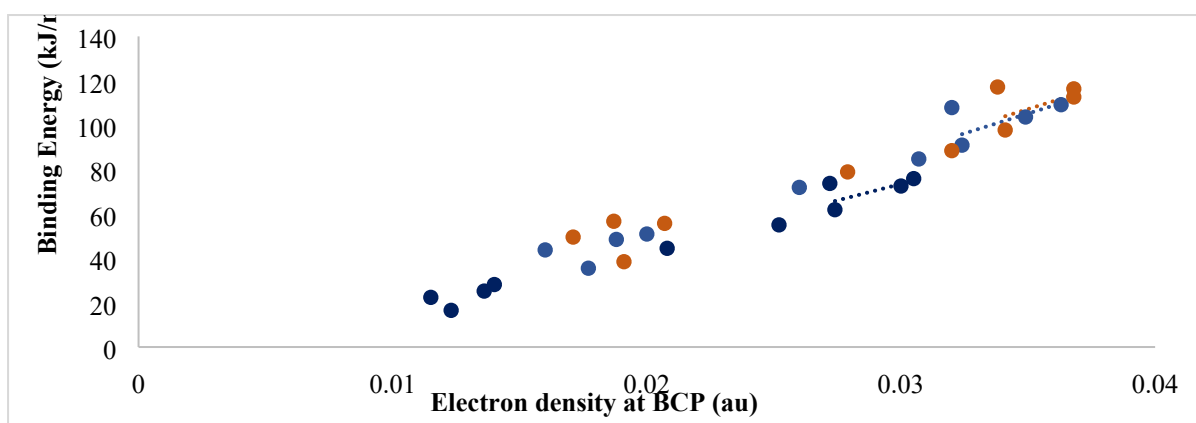

**Figure D5.** Binding energy (kJ/mol) versus electron density at BCP (au) plot for Mg-bonded complexes.

**Table D6.** Electron density at BCP (au) and binding energy (kJ/mol) data for Ca-bonded complexes.

| Complexes                                             | Electron Density (au) | Binding Energy (kJ/mol) |
|-------------------------------------------------------|-----------------------|-------------------------|
| F <sub>2</sub> Ca•••OH <sub>2</sub>                   | 0.0312                | 91.7                    |
| F <sub>2</sub> Ca•••SH <sub>2</sub>                   | 0.0173                | 48.0                    |
| F <sub>2</sub> Ca•••NH <sub>3</sub>                   | 0.0287                | 90.9                    |
| F <sub>2</sub> Ca•••NCH                               | 0.0244                | 69.1                    |
| F <sub>2</sub> Ca•••CO                                | 0.0161                | 32.4                    |
| F <sub>2</sub> Ca•••OCH <sub>2</sub>                  | 0.0286                | 80.0                    |
| F <sub>2</sub> Ca•••C <sub>2</sub> H <sub>4</sub>     | 0.0146                | 40.6                    |
| F <sub>2</sub> Ca•••OHCH <sub>3</sub>                 | 0.032                 | 91.3                    |
| F <sub>2</sub> Ca•••PH <sub>3</sub>                   | 0.0172                | 43.4                    |
| F <sub>2</sub> Ca•••O(CH <sub>3</sub> ) <sub>2</sub>  | 0.0351                | 92.9                    |
| Cl <sub>2</sub> Ca•••OH <sub>2</sub>                  | 0.0336                | 94.5                    |
| Cl <sub>2</sub> Ca•••SH <sub>2</sub>                  | 0.0208                | 54.8                    |
| Cl <sub>2</sub> Ca•••NH <sub>3</sub>                  | 0.0324                | 102.9                   |
| Cl <sub>2</sub> Ca•••NCH                              | 0.028                 | 78.3                    |
| Cl <sub>2</sub> Ca•••CO                               | 0.0192                | 38.2                    |
| Cl <sub>2</sub> Ca•••OCH <sub>2</sub>                 | 0.0314                | 84.4                    |
| Cl <sub>2</sub> Ca•••C <sub>2</sub> H <sub>4</sub>    | 0.0166                | 48.6                    |
| Cl <sub>2</sub> Ca•••OHCH <sub>3</sub>                | 0.0375                | 103.3                   |
| Cl <sub>2</sub> Ca•••PH <sub>3</sub>                  | 0.019                 | 52.0                    |
| Cl <sub>2</sub> Ca•••O(CH <sub>3</sub> ) <sub>2</sub> | 0.0377                | 106.4                   |
| H <sub>2</sub> Ca•••SH <sub>2</sub>                   | 0.0166                | 40.0                    |
| H <sub>2</sub> Ca•••NH <sub>3</sub>                   | 0.0289                | 85.0                    |
| H <sub>2</sub> Ca•••NCH                               | 0.0238                | 63.0                    |
| H <sub>2</sub> Ca•••CO                                | 0.0151                | 27.3                    |
| H <sub>2</sub> Ca•••OCH <sub>2</sub>                  | 0.0283                | 70.1                    |
| H <sub>2</sub> Ca•••C <sub>2</sub> H <sub>4</sub>     | 0.0134                | 34.6                    |
| H <sub>2</sub> Ca•••OHCH <sub>3</sub>                 | 0.0328                | 85.6                    |
| H <sub>2</sub> Ca•••PH <sub>3</sub>                   | 0.0148                | 37.1                    |
| H <sub>2</sub> Ca•••O(CH <sub>3</sub> ) <sub>2</sub>  | 0.0345                | 88.3                    |
| H <sub>2</sub> Ca•••CH <sub>3</sub> CN                | 0.0267                | 77.6                    |

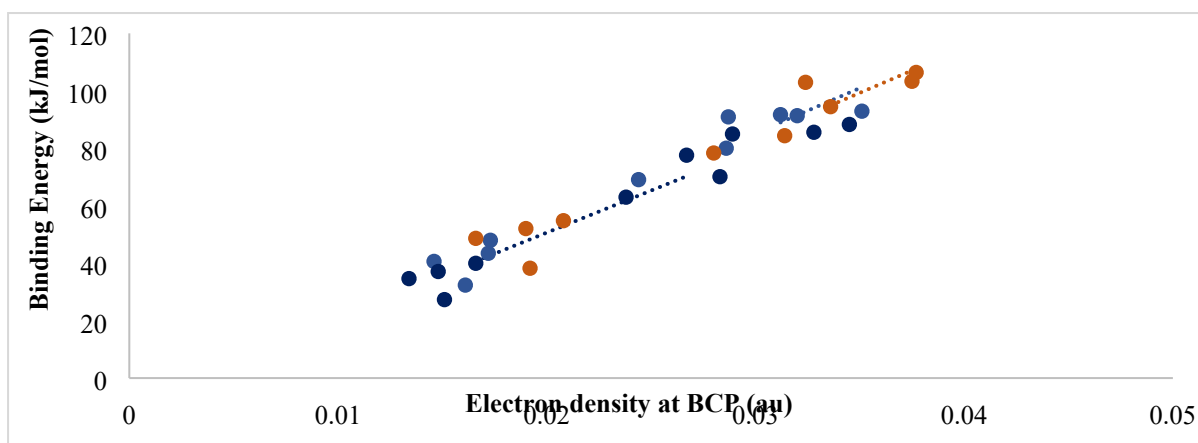

**Figure D6.** Binding energy (kJ/mol) versus electron density at BCP (au) plot for Ca-bonded complexes.
